# Supplementary material
Source: bioRxiv or medRxiv preprint supplement (https://www.biorxiv.org/highwire/filestream/118469/field_highwire_adjunct_files/0/273318-1.pdf)
Supplement: Supplementary file [file 273318-1.pdf]

## Supplemental Text

EA Hay and R Parthasarathy, *Performance of convolutional neural networks for identification of bacteria in 3D microscopy datasets* (2018)

### Supplemental Figure Caption

**Figure S1.** Examples of agreement and disagreement in bacterial classification. (a) Two example volumes in which all humans classified the object as a bacterium; (b) Two example volumes in which all humans classified the object as noise; (c) Two example volumes in which 50% humans classified the object as a bacterium, and 50% as noise. As in Figure 1, these are  $xy$ -,  $xz$ -, and  $yz$ - projections of the 3D volumes (top to bottom), with the images spanning  $4.5\ \mu\text{m}$  in  $x$  and  $y$ , and  $8.0\ \mu\text{m}$  in  $z$ . Please note that all 21000 manually classified image volumes, along with labels, are made available for the reader.

### Supplemental movie caption

**Movie S1.** A light sheet fluorescence microscopy scan through the anterior “bulb” of a larval zebrafish gut, colonized by *Vibrio* ZWU0020 expressing green fluorescent protein. Each frame is one  $z$ -section, with  $1\ \mu\text{m}$  spacing.
